# Supplementary material for: Mitochondrial Respiration in Human Colorectal and Breast Cancer Clinical Material Is Regulated Differently
Source: PubMed Central journal article supplement (PMC5525093; doi:10.1155/2017/1372640), 2017-07-11
Supplement: 1372640.f1.pdf [file 1372640.f1.pdf]

**Supplementary Table 1.** Activity of citrate synthase as marker of mitochondrial mass [105], in human breast and colorectal cancers as well as in corresponding normal tissues. Enzymatic activity measured as mU/mg protein, mean  $\pm$  SE.

| Samples                 | Enzymatic activity      | <i>p</i> -values* |
|-------------------------|-------------------------|-------------------|
| Human breast cancer     | 14.55 $\pm$ 2.59; n = 9 | < 0.005           |
| Healthy breast tissue   | 4.09 $\pm$ 1.15; n = 9  |                   |
| Human colorectal cancer | 83 $\pm$ 19; n = 6      | < 0.05            |
| Healthy colon tissue    | 46 $\pm$ 6; n = 6       |                   |

**Notes:** \* significant difference between malignant vs. adjacent healthy tissue samples.

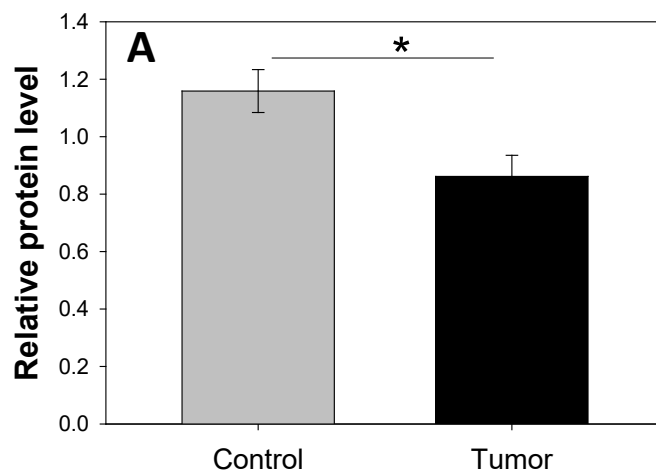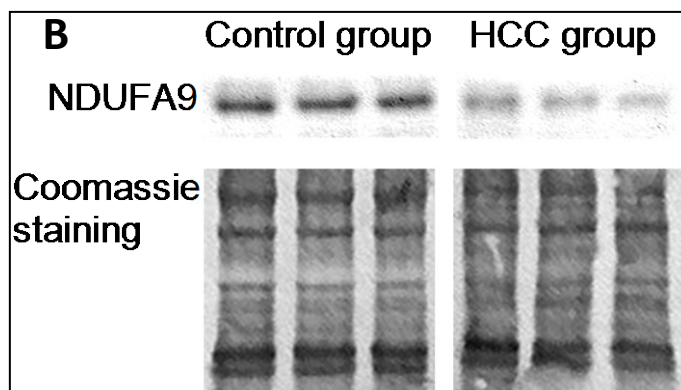

**Supplementary Fig. 1.** Quantification of Complex I subunit NDUFA9 expression levels using Western blot (WB) and anti-NDUFA9 antibody in HCC and healthy colon tissue samples (A); respective WB image of NDUFA9 protein levels (B). Levels of NDUFA9 were normalized to total protein content quantified by coomassie blue staining. Data are represented as mean values  $\pm$  SEM from 4 independent experiments; \*  $p < 0.05$ .
